# Supplementary material
Source: Springer Nature journal article supplement (https://www.springermedizin.de/resource/supplementary/12967_2012_1188_MOESM1_ESM.pdf/9573280)

**A**

miR-155 fold change

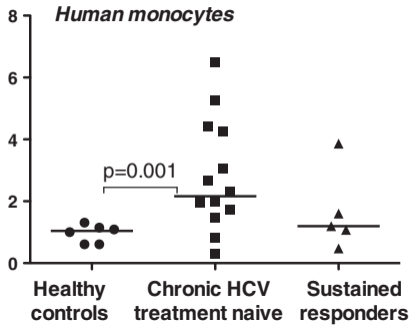**B**

miR-155 fold change

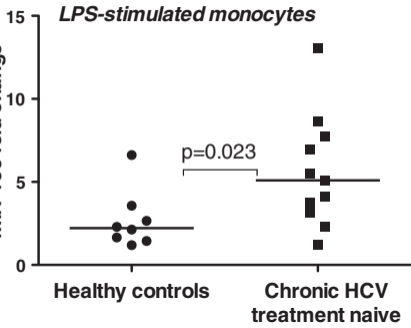

Supplement: MOESM1 [file 9573280]
